# Supplementary material
Source: bioRxiv or medRxiv preprint supplement (https://www.biorxiv.org/highwire/filestream/134117/field_highwire_adjunct_files/6/444521-15.pdf)
Supplement: Supplementary file [file 444521-15.pdf]

|                    | <b>Bacteria (16S)</b> |                 | <b>Fungi (ITS)</b>   |                 | <b>Metabolomics</b>  |                 |
|--------------------|-----------------------|-----------------|----------------------|-----------------|----------------------|-----------------|
|                    | <b>R<sup>2</sup></b>  | <b><i>p</i></b> | <b>R<sup>2</sup></b> | <b><i>p</i></b> | <b>R<sup>2</sup></b> | <b><i>p</i></b> |
| Wetted             | 0.374                 | < 0.0001        | 0.450                | < 0.0001        | 0.204                | < 0.0001        |
| Timepoint          | 0.130                 | < 0.0001        | 0.094                | < 0.0001        | 0.178                | < 0.0001        |
| Control            | 0.074                 | < 0.0001        | 0.107                | < 0.0001        | 0.001                | 0.983           |
| Location 1         | 0.045                 | 0.0006          | 0.076                | 0.0006          | 0.009                | 0.502           |
| Location 2         | 0.214                 | < 0.0001        | 0.303                | < 0.0001        | 0.007                | 0.603           |
| Gypsum             | 0.085                 | < 0.0001        | 0.022                | 0.0271          | 0.141                | <0.0001         |
| MDF                | 0.108                 | < 0.0001        | 0.009                | 0.2399          | 0.238                | <0.0001         |
| MF Gypsum          | 0.027                 | 0.0095          | 0.008                | 0.2720          | 0.209                | <0.0001         |
| OSB                | 0.041                 | 0.0015          | 0.002                | 0.762           | 0.503                | <0.0001         |
| <i>Bacillus</i>    | 0.259                 | < 0.0001        | NA                   | NA              | NA                   | NA              |
| <i>Pseudomonas</i> | 0.088                 | < 0.0001        | NA                   | NA              | NA                   | NA              |
| <i>Erwinia</i>     | 0.098                 | < 0.0001        | NA                   | NA              | NA                   | NA              |
| Chloroplast        | 0.196                 | < 0.0001        | NA                   | NA              | NA                   | NA              |
| <i>Penicillium</i> | NA                    | NA              | 0.106                | <0.0001         | NA                   | NA              |
| <i>Eurotium</i>    | NA                    | NA              | 0.185                | <0.0001         | NA                   | NA              |
